# Supplementary material
Source: PubMed Central journal article supplement (PMC4618462)
Supplement: NIHMS727098-supplement-Suppl_1.pdf [file NIHMS727098-supplement-Suppl_1.pdf]

**SUPPLEMENTARY MATERIALS: Titles of Tables and Figures**

**Performance characteristics of next generation sequencing in clinical mutation detection of colorectal cancers**

Haley et al.

Supplementary Tables S1-S4

Supplementary Figures S1-S8

**Supplementary Table S1. 310 specimens from 305 tumors of 301 patients with colorectal cancers**

**Supplementary Table S2. 310 specimens with colorectal cancers.**

**Supplementary Table S3. Mutant allele frequency of positive control specimens (mean + SD).**

**Supplementary Table S4. Reportable ranges and reference ranges of colorectal cancer panel.**

**Supplementary Figure S1. Distribution of *KRAS* mutations, including 3 uncommon mutations (p.G15S [c.43G>A], p.Q22K [c.64C>A] and p.K147N [c.441G>C]).**

**Supplementary Figure S2. Distribution of *PIK3CA* mutations.**

**Supplementary Figure S3. Specimens with less than 20% tumor cellularity: challenges posted to molecular diagnosis**

**Supplementary Figure S4. Intra-tumor heterogeneity of *KRAS* mutation.**

**Supplementary Figure S5. Presence of concomitant *NRAS* and *PIK3CA* mutations in different tumor subpopulations.**

**Supplementary Figure S6. Concomitant mutations of different genes.**

**Supplementary Figure S7. Correlation of mutant allele frequencies in tumors with two mutations within the same gene.**

**Supplementary Figure S8. SNP array analysis of case 54.**
